# Supplementary material
Source: publisher figshare collection journal article supplement (https://gsapubs.figshare.com/articles/dataset/_/20076146)
Supplement: Supplementary file 1 [file 1]

## Sheet: OSL ages
												SAR MET-pIRIR250					SAR MET-pIRIR300					MAR MET-pIRIR300						Notes:
Units	Sample ID	Depth (m)	Revised depth (m)	Water content	K20 (%)	SE.K20 (%)	CaO (%)	Alpha counts (counts/1000s)	SE.alpha	Dose rate (Gy/ka)	SE (Gy/ka)	De (Gy)	SE (Gy)	number of qliauots	Age (ka)	SE (ka)	De (Gy)	SE (Gy)	number of qliauots	Age (ka)	SE (ka)	De (Gy)	SE (Gy)	number of qliauots *	Age (ka)	SE (ka)		De values were estimated with the SGC method.
S1	14LC-8.9	8.9	9.05	25±5%	2.67	0.0801	5.403	12.59	0.2	3.56621	0.115315	271.146	3.00899	16	76.032	2.59929												*For the MAR protocol, the 'number of aliquots' column has two numbers. The first one is the number of aliquots used to measure the natural signal, and the second one is the number of aliquots used to measure the regenerative-dose signal.
	14LC-9.0	9	9.15	25±5%	2.66	0.0798	4.99396	12.94	0.18	3.59905	0.116029	270.719	5.64019	2	75.2196	2.8873
	14LC-9.1	9.1	9.25	25±5%	2.73	0.0819	3.85112	12.65	0.2	3.60973	0.116932	294.273	6.35685	7	81.522	3.17411
	14LC-9.2	9.2	9.35	25±5%	2.8	0.084	3.59155	12.88	0.2	3.67986	0.119339	303.3	3.12126	6	82.4216	2.8043
	14LC-9.3	9.3	9.45	25±5%	2.71	0.0813	2.76816	13.5	0.18	3.69261	0.119034	319.817	3.49867	14	86.6101	2.94832
	14LC-9.4	9.4	9.55	25±5%	2.74	0.0822	2.23566	12.82	0.17	3.63326	0.11746	328.124	2.72642	7	90.3113	3.01456
	14LC-9.6	9.6	9.75	25±5%	2.71	0.0813	1.83565	13	0.22	3.63325	0.117783	340.56	3.90815	7	93.7343	3.22345
	14LC-9.8	9.8	9.95	25±5%	2.74	0.0822	1.43337	12.78	0.17	3.6258	0.11733	361.314	5.36931	6	99.6509	3.54846
	14LC-10.0	10	10.15	25±5%	2.7	0.081	1.31091	12.27	0.22	3.54063	0.115197	379.831	4.79293	22	107.278	3.74367
	14LC-10.2	10.2	10.35	25±5%	2.7	0.081	1.49035	12.62	0.17	3.57928	0.115861	413.216	11.1628	6	115.447	4.86742
	14LC-10.3	10.3	10.45	25±5%	2.68	0.0804	1.14858	12.41	0.17	3.54187	0.114708	395.606	10.4601	7	111.694	4.6698
	14LC-10.4	10.4	10.55	25±5%	2.68	0.0804	1.16674	12.4	0.17	3.54007	0.114676	425.957	6.44993	7	120.324	4.30256
	14LC-10.5	10.5	10.65	25±5%	2.59	0.0777	2.05689	12.61	0.19	3.50608	0.113394	413.627	5.23615	13	117.974	4.09739
	14LC-10.6	10.6	10.75	25±5%	2.56	0.0768	2.84883	11.83	0.19	3.39717	0.110176	440.246	4.57211	12	129.592	4.41312
Boundary	14LC-10.7	10.7	10.85	20±5%	2.55	0.0765	1.78219	11.62	0.19	3.50971	0.123312	472.853	3.25518	13	134.727	4.82361
L2	14LC-10.8	10.8	10.95	15±5%	2.25	0.0675	8.17657	10.59	0.18	3.32678	0.117303	424.67	6.75658	13	127.652	4.93802
	14LC-10.9	10.9	11.05	15±5%	1.94	0.0582	14.7833	9.63	0.15	2.98741	0.104425	435.667	2.99614	23	145.834	5.19536
	14LC-11.0	11	11.15	15±5%	1.98	0.0594	14.3573	9.98	0.19	3.05897	0.107346	435.34	2.47	25	142.316	5.05904
	14LC-11.1	11.1	11.25	15±5%	2.06	0.0618	13.6913	10.25	0.2	3.1486	0.11078	437.88	5.19292	6	139.072	5.16358
	14LC-11.2	11.2	11.35	15±5%	2.03	0.0609	13.7592	9.79	0.17	3.06904	0.107796	433.976	3.26376	12	141.405	5.07923
	14LC-11.3	11.3	11.45	15±5%	2.26	0.0678	9.68206	10.62	0.18	3.33461	0.117707	455.191	5.83894	12	136.505	5.12673
	14LC-11.4	11.4	11.55	15±5%	2.2	0.066	11.4871	10.39	0.17	3.26291	0.114986	474.502	7.90606	14	145.423	5.6687
	14LC-11.5	11.5	11.65	15±5%	2.27	0.0681	9.80249	11.08	0.21	3.39838	0.12013	470.9	5.41907	12	138.566	5.15122
	14LC-11.7	11.7	11.85	15±5%	2.37	0.0711	8.76994	11.17	0.21	3.47892	0.123347	468.418	5.44311	15	134.645	5.02377
	14LC-12.0	12	12.15	15±5%	2.37	0.0711	8.87416	11.06	0.21	3.46347	0.122914	488.56	8.19354	6	141.061	5.5369						502.463	25.0662	11; 6	145.075	8.88177
	14LC-12.2	12.2	12.35	15±5%	2.33	0.0699	10.4681	10.86	0.18	3.40914	0.12066	501.6	12.3699	6	147.134	6.34696
	14LC-12.4	12.4	12.55	15±5%	2.42	0.0726	8.40089	11.23	0.18	3.51796	0.12471	483.187	3.66613	14	137.348	4.9792
	14LC-12.5	12.5	12.65	15±5%	2.4	0.072	8.52203	11.34	0.21	3.51724	0.124879	515.1	8.08332	6	146.45	5.68493
	14LC-12.7	12.7	12.85	15±5%	2.4	0.072	8.83222	11.08	0.18	3.48355	0.123541	510.5	14.7786	6	146.546	6.70878
	14LC-12.8	12.8	12.95	15±5%	2.38	0.0714	9.12011	11.4	0.18	3.50928	0.124231	494.44	8.96824	13	140.895	5.60439
	14LC-13.0	13	13.15	15±5%	2.31	0.0693	10.2785	10.77	0.21	3.37985	0.120054	495	7	18	146.456	5.5993
	14LC-13.2	13.2	13.35	15±5%	2.33	0.0699	9.16312	11.46	0.21	3.47981	0.123346	515.1	4.61321	6	148.025	5.41184
	14LC-13.4	13.4	13.55	15±5%	2.25	0.0675	9.65612	11.15	0.21	3.38366	0.119835	511.29	10.6961	6	151.106	6.21543
	14LC-13.5	13.5	13.65	15±5%	2.39	0.0717	7.78244	11.25	0.21	3.49424	0.124237	550.786	4.85676	13	157.627	5.77416
	14LC-13.7	13.7	13.85	15±5%	2.34	0.0702	7.95546	11.39	0.17	3.47584	0.122948	530.1	10.4512	6	152.51	6.17597
	14LC-13.8	13.8	13.95	15±5%	2.35	0.0705	8.11381	11.5	0.19	3.49628	0.123864	538.9	5.197	6	154.135	5.65929
	14LC-14.0	14	14.15	15±5%	2.42	0.0726	7.72497	11.12	0.22	3.49686	0.1247	549.93	9.01412	6	157.264	6.17219						552.866	29.2566	12; 9	158.103	10.0889
	14LC-14.2	14.2	14.35	20±5%	2.55	0.0765	6.71794	11.56	0.21	3.48495	0.118869	557.7	8.13272	18	160.031	5.93647
	14LC-14.4	14.4	14.55	20±5%	2.55	0.0765	6.63046	11.5	0.19	3.47697	0.118454	566.59	7.38113	6	162.955	5.94362
	14LC-14.5	14.5	14.65	20±5%	2.63	0.0789	6.39363	12.04	0.18	3.59475	0.122373	595.8	7.82386	7	165.742	6.04742
	14LC-14.7	14.7	14.85	20±5%	2.57	0.0771	7.06295	11.69	0.19	3.51194	0.11965	590.2	15.8194	3	168.055	7.28507
	14LC-14.8	14.8	14.95	20±5%	2.56	0.0768	7.14007	11.35	0.16	3.46415	0.117916	581.34	14.6206	13	167.816	7.10232
	14LC-15.0	15	15.15	20±5%	2.52	0.0756	7.71659	11.88	0.18	3.50015	0.11893	598.76	14.65	14	171.067	7.16274						626.157	30.0306	24; 16	178.894	10.5148
	14LC-15.2	15.2	15.35	20±5%	2.49	0.0747	7.89389	11.55	0.17	3.43984	0.116884	590	6.5728	6	171.519	6.13338
	14LC-15.4	15.4	15.55	20±5%	2.43	0.0729	8.87567	11.7	0.17	3.41699	0.115857	600.19	19.1005	5	175.649	8.16797
	14LC-15.5	15.5	15.65	20±5%	2.48	0.0744	8.40179	11.68	0.18	3.44767	0.117176	622.57	11.7644	12	180.577	7.02208						626.822	20.8925	14; 10	181.81	8.65475
	14LC-15.7	15.7	15.85	20±5%	2.48	0.0744	7.98354	11.43	0.16	3.41704	0.116112	600.3	17.3486	7	175.678	7.83662
	14LC-15.8	15.8	15.95	20±5%	2.42	0.0726	8.66263	11.52	0.2	3.38737	0.115246	601	6.53197	7	177.424	6.33688
	14LC-16.0	16	16.15	20±5%	2.46	0.0738	8.11998	11.55	0.18	3.41705	0.116193	623.48	16.4575	6	182.462	7.85441						642.568	31.4123	14; 10	188.048	11.198
Boundary	14LC-16.3	16.3	16.45	20±5%	2.58	0.0774	6.55263	12.19	0.21	3.57297	0.12189	672.3	13.4611	5	188.163	7.443						697.836	66.078	12; 12	195.31	19.6575
S2	14LC-16.5	16.5	16.65	25±5%	2.57	0.0771	6.23912	11.33	0.2	3.32007	0.111948	646.659	11.9487	13	194.773	7.48893						677.258	33.2816	14; 9	203.989	12.1572
	14LC-16.7	16.7	16.85	25±5%	2.82	0.0846	2.05965	12.73	0.21	3.6388	0.119425	710.8	10.8	7	195.339	7.0647
	14LC-16.8	16.8	16.95	25±5%	2.8	0.084	2.20062	12.56	0.26	3.60632	0.118944	730.9	22.0731	7	202.672	9.0634						732.376	63.1005	20; 11	203.081	18.7354
	14LC-16.9	16.9	17.05	25±5%	2.81	0.0843	1.54639	13.23	0.19	3.68898	0.12062	739.045	19.4145	14	200.339	8.40282
	14LC-17.0	17	17.15	25±5%	2.81	0.0843	1.31393	12.89	0.19	3.64982	0.11952	712	22.5267	7	193.004	7.96919	715.162	22.9562	7	195.944	8.98509	768.785	48.4507	13; 18	210.636	14.9599
	14LC-17.2	17.2	17.35	25±5%	2.81	0.0843	1.05359	12.89	0.2	3.64924	0.119609	711.316	13.8821	14	194.922	7.43562
	14LC-17.4	17.4	17.55	25±5%	2.79	0.0837	1.42968	12.76	0.22	3.62107	0.118907	746.99	14.2751	5	206.29	7.83766
	14LC-17.5	17.5	17.65	25±5%	2.47	0.0741	7.48556	11.91	0.26	3.3197	0.109105	686.29	17.82	6	206.733	8.65908						660.447	28.2384	10; 13	198.948	10.729
	14LC-17.7	17.7	17.85	25±5%	2.38	0.0714	8.59017	11.3	0.25	3.19207	0.104939	663.936	8.42115	10	207.996	7.32914						727.233	27.5506	27; 15	227.825	11.4276
	14LC-17.8	17.8	17.95	25±5%	2.4	0.072	8.47895	11.67	0.21	3.24683	0.106106	677.371	12.7279	14	208.625	7.86447						680.268	50.065	15; 9	209.517	16.8715
	14LC-18.0	18	18.15	20±5%	2.27	0.0681	10.0989	10.71	0.16	3.18351	0.10811	716.92	11.7836	16	225.198	8.49625						795.619	58.8172	20; 15	249.919	20.3317
	14LC-18.2	18.2	18.35	20±5%	2.42	0.0726	8.13762	11.27	0.18	3.35035	0.11416	727.606	26.7752	8	217.173	10.8916						651.348	57.079	15; 14	194.412	18.2793
	14LC-18.5	18.5	18.65	25±5%	2.64	0.0792	5.59843	11.93	0.17	3.42768	0.112213	748.207	13.2829	15	218.284	8.12916						769.1	59.7207	25; 9	224.379	18.9082
	14LC-18.6	18.6	18.75	25±5%	2.67	0.0801	5.37379	12.3	0.22	3.48884	0.114583	743.902	13.6111	18	213.223	8.01622						844.041	54.0799	17; 9	241.926	17.4186
	14LC-18.8	18.8	18.95	25±5%	2.63	0.0789	6.02899	11.72	0.17	3.39656	0.111302	761	14	7	224.05	8.41981						779.316	34.8369	24; 6	229.442	12.7171
	14LC-19.0	19	19.15	25±5%	2.42	0.0726	9.31533	11.27	0.16	3.21081	0.104817	753.45	18.1129	10	234.66	9.51346						809.039	44.5438	27; 16	251.973	16.1283
	14LC-19.2	19.2	19.35	25±5%	2.62	0.0786	6.07909	12.01	0.18	3.42238	0.112082	805.28	18.82	9	235.298	9.46684											sample used up
	14LC-19.4	19.4	19.55	25±5%	2.6	0.078	6.25333	11.79	0.18	3.38403	0.110902	771.723	7.60091	15	228.048	7.80387						864.648	81.6608	20; 8	255.508	25.5428
Boundary	14LC-19.5	19.5	19.65	20±5%	2.56	0.0768	7.04704	11.79	0.22	3.50309	0.124421	829.9	18	7	236.905	9.85908	840.885	55.7075	7	240.041	18.0436						sample used up
L3	14LC-19.6	19.6	19.75	15±5%	2.52	0.0756	7.79772	12	0.18	3.66076	0.13065	797.846	13.3631	14	217.945	8.59224						923.641	55.5088	26; 18	252.308	17.6353
	14LC-19.8	19.8	19.95	15±5%	2.25	0.0675	12.7081	11.31	0.16	3.38366	0.119958	827.086	13.4114	7	244.436	9.52922						837.618	59.4596	31;19	247.548	19.6422
	14LC-20.0	20	20.15	15±5%	2.48	0.0744	8.26465	11.78	0.17	3.60408	0.12853	827	19	7	229.462	9.73427						913.363	72.9297	15; 9	253.425	22.1619
	14LC-20.2	20.2	20.35	15±5%	2.39	0.0717	9.13324	11.07	0.16	3.45103	0.123031	738.524	13.6579	6	214.001	8.59463						879.074	79.0267	7; 13	254.728	24.6343
	14LC-20.4	20.4	20.55	15±5%	2.41	0.0723	8.74163	11.7	0.17	3.54394	0.126193	810.158	16.9159	6	228.604	9.43634						820.878	42.0788	48; 18	231.628	14.457
	14LC-20.6	20.6	20.75	15±5%	2.37	0.0711	8.92478	11.33	0.2	3.46885	0.123869	813.173	26.2881	6	234.421	11.2917	825.355	53.8067	6	237.933	17.6859	872.21	63.8493	21;12	251.44	20.4796
	14LC-20.8	20.8	20.95	15±5%	2.4	0.072	9.21948	11.12	0.16	3.46312	0.123517	826.633	21.3891	6	238.696	10.5178						949.34	86.0802	17;8	274.128	26.71
	14LC-21.0	21	21.15	15±5%	2.4	0.072	9.02039	11.2	0.16	3.47279	0.123834	761.621	25.9467	7	219.311	10.8156						1028.18	48.7773	18;12	296.068	17.5708
	14LC-21.2	21.2	21.35	15±5%	2.46	0.0738	8.1461	11.61	0.17	3.56618	0.127277	801.968	22.3857	5	224.882	10.1892						890.637	83.0151	22;8	249.745	24.9266
	14LC-21.4	21.4	21.55	15±5%	2.43	0.0729	8.39669	11.43	0.21	3.52205	0.126097	758	46	17	215.215	15.164	818.454	29.2108	8	232.38	11.7474	1058.76	120.271	36;8	300.607	35.8037
	14LC-21.6	21.6	21.75	15±5%	2.45	0.0735	7.8397	11.83	0.21	3.58607	0.128255											1067.18	80.5382	15;12	297.59	24.8529
	14LC-21.7	21.7	21.85	15±5%	2.56	0.0768	7.03154	11.89	0.17	3.67078	0.131281	670	20	6	182.522	8.50272	700.715	21.9522	6	190.89	9.07583						sample used up
	14LC-21.8	21.8	21.95	15±5%	2.51	0.0753	7.41919	11.71	0.18	3.61279	0.13248	780	75	7	215.899	22.2179	793.121	39.6403	7	219.531	13.6086	1031.74	53.767	13;8	285.58	18.1975
	14LC-21.9	21.9	22.05	15±5%	2.32	0.0696	7.75	12.3	0.17	3.55325	0.129791											904.648	44.5657	34;8	254.597	15.6139
	14LC-22.0	22	22.15	15±5%	2.46	0.0738	7.66904	11.28	0.16	3.52317	0.129358	800	32	8	227.068	12.3289	803.038	23.4486	7	227.93	10.6926	905.353	52.5709	31;14	256.971	17.6541
	14LC-22.1	22.1	22.25	15±5%	2.33	0.0699	8.17	11.82	0.17	3.49953	0.128189	831.092	12.6441	11	237.487	9.41967						907.092	20.7144	40;11	259.204	11.1887
	14LC-22.2	22.2	22.35	15±5%	2.52	0.0756	6.89285	12.29	0.19	3.69209	0.13508	767.807	30.3323	6	207.96	11.1975	809.886	29.0865	6	219.357	11.246	947.391	67.0893	34;18	256.6	20.453
	14LC-22.3	22.3	22.45	15±5%	2.38	0.0714	6.9	12.63	0.172	3.63625	0.132632											1013.21	51.7263	31;9	278.642	17.4829
Boundary	14LC-22.4	22.4	22.55	20±5%	2.54	0.0762	6.59788	11.6	0.18	3.46123	0.121604	809.812	17.8359	12	233.967	9.70169	754.92	23.0311	14	218.108	10.1487	1012.21	76.1599	22;9	292.443	24.2844
S3	14LC-22.6	22.6	22.75	25±5%	2.6	0.078	5.7257	11.94	0.19	3.39487	0.114373											921.958	34.798	24;8	271.574	13.7396
	14LC-22.8	22.8	22.95	25±5%	2.7	0.081	4.20249	12.07	0.19	3.47312	0.114261											905.005	27.4111	30;8	260.574	11.6524
	14LC-23.0	23	23.15	25±5%	2.76	0.0828	2.78587	13.44	0.23	3.66762	0.120494											980.731	61.5728	15;8	267.403	18.9479
	14LC-23.2	23.2	23.35	25±5%	2.64	0.0792	4.59202	12.75	0.22	3.51195	0.115321	840.502	36.2808	6	239.326	12.98						1045.92	76.7896	20;8	297.817	23.9525
	14LC-23.4	23.4	23.55	25±5%	2.56	0.0768	5.71658	12.83	0.22	3.46979	0.113693											1080.17	131.83	24;9	311.307	39.3391
	14LC-23.6	23.6	23.75	25±5%	2.55	0.0765	5.74551	11.86	0.21	3.35224	0.110235											949.505	63.6771	24;10	283.245	21.1561
	14LC-23.8	23.8	23.95	25±5%	2.55	0.0765	4.72083	12.46	0.22	3.42051	0.112265											1096.2	59.1162	49;14	320.477	20.232
	14LC-24.0	24	24.15	25±5%	2.6	0.078	3.08208	12.38	0.22	3.44293	0.113186											964.003	55.9618	18;8	279.995	18.6795
	14LC-24.2	24.2	24.35	25±5%	2.7	0.081	1.54874	12.46	0.19	3.51551	0.115516	885.838	22.203	5	251.98	10.4136						1093.52	78.0468	22;9	311.055	24.4405
	14LC-24.4	24.4	24.55	25±5%	2.66	0.0798	1.47189	12.76	0.2	3.52402	0.115627											1096.84	72.4729	25;11	311.248	22.9615
Boundary	14LC-24.5	24.5	24.65	20±5%	2.34	0.0702	7.97276	11.81	0.19	3.34936	0.119202											1061.53	84.3815	24;17	316.934	27.6031
L4	14LC-24.8	24.8	24.95	15±5%	2.45	0.0735	6.35499	11.77	0.19	3.57337	0.132614											1196.76	66.882	14;19	334.91	22.4678
	14LC-25.0	25	25.15	15±5%	2.26	0.0678	9.35852	11.27	0.16	3.37659	0.125631											1161.01	98.5149	30;12	343.841	31.8574
	14LC-25.2	25.2	25.35	15±5%	2.19	0.0657	11.5687	10.43	0.18	3.22141	0.1209											1146.57	70.4464	31;8	355.921	25.6251
	14LC-25.4	25.4	25.55	15±5%	2.33	0.0699	9.11691	11.25	0.18	3.42275	0.127496											1146.29	70.5661	46;17	334.904	24.0972

## Sheet: Bacon model ages
		Bacon model ages				Notes:
Boundaries	Depth (m)	min age (ka)	max age (ka）	mean age (ka）		Bacon age-depth modelling with parameters: acc.shape = 1.5, mem.strength = 4.
	0.1	-2.153	0.479	-0.404		The prior accumulation rates (the acc.mean) were set as 300 year/cm in paleosol units, and 100 or 150 year/cm in loess units.
	0.2	-0.817	0.698	0.173		Modelling thickness was set as 10 cm and modelling output was also with a resolution of 10 cm.
	0.3	0.363	0.856	0.643
	0.4	0.575	1.016	0.774
	0.5	1.127	1.25	1.187
	0.6	1.418	6.424	3.352
	0.7	2.525	7.842	5.501
	0.8	6.882	8.605	7.836
	0.9	7.468	10.189	8.72
S0/L1	1	8.136	11.092	9.583
	1	8.136	11.092	9.583
	1.1	8.572	11.509	10.072
	1.2	9.399	12.239	10.937
	1.3	10.869	12.867	11.807
	1.4	11.536	15.19	13.044
	1.5	12.315	16.463	14.236
	1.6	13.339	17.64	15.429
	1.7	15.014	18.674	16.656
	1.8	16.387	22.187	19.147
	1.9	18.57	23.683	21.444
	2	19.864	24.912	22.602
	2.1	21.251	25.876	23.75
	2.2	22.691	26.753	24.877
	2.3	23.516	27.498	25.616
	2.4	24.335	28.181	26.328
	2.5	25.345	29.022	27.249
	2.6	26.127	29.922	28.047
	2.7	26.933	30.702	28.842
	2.8	27.817	31.665	29.802
	2.9	28.459	32.507	30.466
	3	29.073	33.202	31.104
	3.1	29.655	33.858	31.736
	3.2	30.326	34.504	32.361
	3.3	30.905	35.14	33.009
	3.4	31.466	35.882	33.666
	3.5	32.07	36.598	34.33
	3.6	32.674	37.282	34.994
	3.7	33.401	38.004	35.672
	3.8	34.075	38.663	36.334
	3.9	34.691	39.314	36.951
	4	35.289	40.026	37.571
	4.1	35.894	40.642	38.184
	4.2	36.525	41.225	38.802
	4.3	37.154	41.842	39.404
	4.4	37.819	42.642	40.143
	4.5	38.457	43.5	40.898
	4.6	39.179	44.185	41.642
	4.7	39.922	44.951	42.385
	4.8	40.663	45.669	43.131
	4.9	41.316	46.544	43.9
	5	42.069	47.346	44.682
	5.1	42.805	48.162	45.468
	5.2	43.592	48.885	46.246
	5.3	44.352	49.687	47.07
	5.4	45.062	50.397	47.789
	5.5	45.775	51.17	48.491
	5.6	46.501	51.842	49.189
	5.7	47.2	52.556	49.892
	5.8	47.813	53.195	50.536
	5.9	48.458	53.836	51.175
	6	49.085	54.545	51.809
	6.1	49.802	55.105	52.443
	6.2	50.45	55.74	53.086
	6.3	51.13	56.39	53.758
	6.4	51.782	57.09	54.433
	6.5	52.481	57.729	55.112
	6.6	53.205	58.402	55.771
	6.7	53.848	59.018	56.43
	6.8	54.474	59.71	57.087
	6.9	55.12	60.43	57.742
	7	55.757	61.104	58.413
	7.1	56.398	61.81	59.071
	7.2	57.052	62.459	59.731
	7.3	57.777	63.2	60.439
	7.4	58.414	63.88	61.123
	7.5	59.086	64.614	61.828
	7.6	59.799	65.334	62.529
	7.7	60.464	66.133	63.241
	7.8	61.12	66.853	63.948
	7.9	61.856	67.611	64.671
	8	62.671	68.31	65.41
	8.1	63.382	69.039	66.149
	8.2	64.145	69.805	66.894
	8.3	64.982	70.685	67.796
	8.4	65.91	71.586	68.715
	8.5	66.665	72.53	69.575
	8.6	67.507	73.449	70.413
	8.7	68.338	74.243	71.239
L1/S1	8.8	69.105	75.263	72.138
	8.8	69.105	75.263	72.138
	8.9	69.559	75.721	72.62
	9	71.309	78.016	74.624
	9.1	73.381	80.227	76.681
	9.2	75.372	82.532	78.821
	9.3	77.924	85.563	81.651
	9.4	80.582	88.286	84.403
	9.5	83.513	91.692	87.462
	9.6	85.937	94.765	90.289
	9.7	88.194	97.644	92.808
	9.8	90.948	100.38	95.516
	9.9	93.465	104.039	98.573
	10	96.603	107.048	101.623
	10.1	99.327	110.309	104.788
	10.2	102.599	113.503	108.01
	10.3	105.675	116.688	111.115
	10.4	108.861	119.464	114.141
	10.5	111.768	122.053	116.963
	10.6	115.219	125.332	120.345
	10.7	118.721	128.602	123.776
	10.8	123.972	131.819	127.951
S1/L2	10.85	124.919	132.387	128.74
	10.85	124.919	132.387	128.74
	10.9	125.776	133.133	129.529
	11	126.925	133.953	130.516
	11.1	127.961	134.862	131.498
	11.2	128.968	135.718	132.42
	11.3	129.85	136.588	133.318
	11.4	130.881	137.484	134.236
	11.5	131.854	138.416	135.159
	11.6	132.748	139.299	136.016
	11.7	133.529	140.137	136.798
	11.8	134.243	140.958	137.562
	11.9	135.04	141.743	138.347
	12	135.821	142.52	139.161
	12.1	136.68	143.319	139.972
	12.2	137.433	144.162	140.765
	12.3	138.263	144.986	141.57
	12.4	139.026	145.784	142.37
	12.5	139.818	146.571	143.153
	12.6	140.537	147.368	143.922
	12.7	141.368	148.238	144.751
	12.8	142.124	149.082	145.571
	12.9	142.918	149.851	146.376
	13	143.754	150.665	147.193
	13.1	144.573	151.559	148.05
	13.2	145.473	152.439	148.928
	13.3	146.366	153.329	149.818
	13.4	147.205	154.34	150.74
	13.5	148.147	155.251	151.678
	13.6	149.075	156.223	152.614
	13.7	149.887	157.143	153.537
	13.8	150.722	158.075	154.424
	13.9	151.622	158.9	155.307
	14	152.517	160.02	156.227
	14.1	153.305	161.014	157.162
	14.15	153.541	161.237	157.408
	14.15	153.541	161.237	157.408
	14.2	153.775	161.51	157.653
	14.3	155.087	163.047	159.027
	14.4	156.416	164.599	160.402
	14.5	157.722	165.895	161.733
	14.6	159.038	167.297	163.069
	14.7	160.24	168.657	164.387
	14.8	161.434	169.958	165.684
	14.9	162.611	171.511	166.977
	15	163.856	172.81	168.249
	15.1	165.055	174.236	169.505
	15.2	166.202	175.462	170.758
	15.3	167.452	176.706	172.007
	15.4	168.691	178.188	173.273
	15.5	169.881	179.485	174.577
	15.6	171.109	180.85	175.881
	15.7	172.419	182.21	177.147
	15.8	173.507	183.498	178.347
	15.9	174.573	184.736	179.574
	16	175.769	186.303	180.837
	16.1	176.943	187.809	182.214
	16.2	178.018	189.459	183.58
	16.3	179.187	191.046	184.932
	16.4	180.378	192.492	186.262
L2/S2	16.45	180.8	192.865	186.629
	16.45	180.8	192.865	186.629
	16.5	181.159	193.349	186.996
	16.6	182.938	196.318	189.283
	16.7	184.745	199.116	191.556
	16.8	186.468	201.402	193.635
	16.9	188.406	203.69	195.746
	17	190.351	205.882	197.882
	17.1	192.25	208.149	199.989
	17.2	194.204	210.353	202.061
	17.3	196.181	212.523	204.078
	17.4	197.918	214.675	206.063
	17.5	199.9	216.696	208.104
	17.6	201.982	218.423	210.128
	17.7	204.042	220.59	212.161
	17.8	206.243	222.71	214.381
	17.85	206.934	223.308	215.067
	17.85	206.934	223.308	215.067
	17.9	207.668	224.072	215.754
	18	208.877	225.314	216.989
	18.1	210.114	226.715	218.246
	18.2	211.287	227.761	219.493
	18.3	212.468	229.043	220.678
	18.4	213.597	230.422	221.862
	18.5	214.866	231.586	223.111
	18.6	216.012	232.864	224.352
	18.65	216.409	233.247	224.712
	18.65	216.409	233.247	224.712
	18.7	216.784	233.576	225.073
	18.8	218.722	235.783	227.153
	18.9	220.63	237.735	229.137
	19	222.67	239.693	231.161
	19.1	224.646	241.746	233.17
	19.2	226.642	243.648	235.14
	19.3	228.497	245.649	237.036
	19.4	230.48	247.56	238.904
	19.5	232.405	249.455	240.78
	19.6	234.286	251.299	242.634
S2/L3	19.65	234.958	251.801	243.287
	19.65	234.958	251.801	243.287
	19.7	235.542	252.436	243.939
	19.8	236.775	253.585	245.106
	19.9	237.844	254.653	246.226
	20	239.03	255.825	247.38
	20.1	240.232	256.946	248.523
	20.2	241.28	258.108	249.656
	20.3	242.389	259.152	250.786
	20.4	243.587	260.404	251.904
	20.5	244.673	261.434	253.015
	20.6	245.794	262.655	254.129
	20.7	246.927	263.783	255.284
	20.8	248.132	264.879	256.449
	20.9	249.241	266.158	257.626
	21	250.37	267.243	258.8
	21.1	251.567	268.461	259.995
	21.2	252.71	269.643	261.174
	21.3	253.744	270.726	262.297
	21.4	254.884	271.948	263.437
	21.5	256.048	273.055	264.575
	21.6	257.098	274.291	265.7
	21.7	258.301	275.409	266.824
	21.8	259.428	276.503	267.944
	21.9	260.48	277.606	269.041
	22	261.565	278.767	270.15
	22.1	262.596	279.846	271.208
	22.2	263.753	280.925	272.308
	22.3	264.836	282.131	273.452
	22.4	266.03	283.456	274.643
	22.5	267.415	284.754	275.883
L3/S3	22.55	267.729	285.121	276.229
	22.55	267.729	285.121	276.229
	22.6	268.048	285.53	276.575
	22.7	269.744	287.819	278.526
	22.8	271.518	289.953	280.504
	22.9	273.355	292.433	282.607
	23	275.125	294.787	284.658
	23.1	277.234	297.601	286.985
	23.2	279.278	300.296	289.386
	23.3	281.523	302.886	291.941
	23.4	283.809	306.093	294.557
	23.5	285.827	308.963	297.092
	23.6	288.192	311.568	299.621
	23.7	290.525	314.545	302.146
	23.8	292.891	317.225	304.659
	23.9	295.315	320.102	307.289
	24	297.804	322.7	309.903
	24.1	300.075	325.545	312.472
	24.2	302.521	328.38	315.006
	24.3	305.186	331.616	317.846
	24.4	307.646	334.518	320.749
	24.5	310.114	337.818	323.65
	24.6	312.884	340.976	326.55
S3/L4	24.65	313.637	341.698	327.308
	24.65	313.637	341.698	327.308
	24.7	314.514	342.459	328.065
	24.8	316.012	344.467	329.621
	24.9	317.42	346.345	331.175
	25	318.739	347.912	332.731
	25.1	320.005	349.547	334.281
	25.2	321.458	351	335.805
	25.3	322.93	352.532	337.356
	25.4	324.379	354.545	338.91
	25.5	325.925	356.13	340.41

## Sheet: G50125
Zhang, J., Hao, Q., and Li, S.-H., 2022, An absolutely dated record of climate change over the last three glacial–interglacial cycles from Chinese loess deposits: Geology, v. 50, https://doi.org/10.1130/G50125.1
